# Supplementary material for: A precise performance-based reimbursement model for the multi-centre NAPKON cohorts – development and evaluation
Source: PubMed Central journal article supplement (PMC11176345; doi:10.1038/s41598-024-63945-5), 2024-06-13
Supplement: 41598_2024_63945_MOESM1_ESM.pdf [file 41598_2024_63945_MOESM1_ESM.pdf]

Supplementary material to

## **A precise performance-based reimbursement model for the multi-centre NAPKON cohorts – development and evaluation**

Katharina S. Appel<sup>1,2</sup>, Chin Huang Lee<sup>2</sup>, Susana M. Nunes de Miranda<sup>2</sup>, Daniel Maier<sup>1,3</sup>,  
Jens-Peter Reese<sup>4,5</sup>, Gabriele Anton<sup>6</sup>, Thomas Bahmer<sup>7,8</sup>, Sabrina Ballhausen<sup>7</sup>, Beate  
Balzuweit<sup>9</sup>, Carla Bellinghausen<sup>10</sup>, Arne Blumentritt<sup>11</sup>, Markus Brechtel<sup>2</sup>, Irina Chaplinskaya-  
Sobol<sup>12</sup>, Johanna Erber<sup>13</sup>, Karin Fiedler<sup>1,2</sup>, Ramsia Geisler<sup>1,2</sup>, Ralf Heyder<sup>14</sup>, Thomas Illig<sup>15</sup>,  
Mirjam Kohls<sup>4</sup>, Jenny Kollek<sup>16</sup>, Lilian Krist<sup>17</sup>, Roberto Lorbeer<sup>18,19,20</sup>, Olga Miljukov<sup>4,5</sup>, Lazar  
Mitrov<sup>21</sup>, Carolin Nürnberger<sup>4,5</sup>, Christian Pape<sup>12</sup>, Christina Pley<sup>22</sup>, Christian Schäfer<sup>23</sup>, Jens  
Schaller<sup>18,19</sup>, Mario Schattschneider<sup>23</sup>, Margarete Scherer<sup>1</sup>, Nick Schulze<sup>1,2</sup>, Dana Stahl<sup>11</sup>,  
Hans Christian Stubbe<sup>24,25</sup>, Thalea Tamminga<sup>7</sup>, Johannes Josef Tebbe<sup>26,27</sup>, Maria J.G.T.  
Vehreschild<sup>28</sup>, Silke Wiedmann<sup>14</sup>, Jörg Janne Vehreschild<sup>1,2,29</sup> on behalf of the NAPKON  
Study Group

1 Goethe University Frankfurt, University Hospital, Center for Internal Medicine, Medical Department 2 (Hematology/Oncology and Infectious Diseases), Frankfurt, Germany

2 University of Cologne, Faculty of Medicine and University Hospital of Cologne, Department I for Internal Medicine, Cologne, Germany

3 German Cancer Consortium (DKTK), Partner Site Frankfurt/Mainz and German Cancer Research Center (DKFZ), Heidelberg, Germany

4 University of Würzburg, Institute for Clinical Epidemiology and Biometry, Würzburg, Germany

5 University Hospital Würzburg, Institute for medical Data Science, Würzburg, Germany

6 Medical School OWL, Bielefeld University, Bielefeld, Germany

7 Internal Medicine Department I, Pneumology Section, University Hospital Schleswig-Holstein Campus Kiel, Kiel, Germany

8 German Center for Lung Research (DZL), Airway Research Center North (ARCN), Grosshansdorf, Germany

9 Charité – Universitätsmedizin Berlin, Corporate Member of Freie Universität Berlin and Humboldt-Universität zu Berlin, Department of Infectious Diseases, Respiratory Medicine and Critical Care, Berlin, Germany

10 Department I of Internal Medicine, Goethe University Frankfurt, University Hospital Frankfurt, Frankfurt am Main, Germany

11 Independent Trusted Third Party of the University Medicine Greifswald, Ellernholzstraße 1-2, 17475 Greifswald, Germany

12 Department of Medical Informatics at the University Medical Center Göttingen, Göttingen, Germany

13 TUM School of Medicine and Health, Department of Clinical Medicine – Clinical Department for Internal Medicine II, Technical University of Munich, University Medical Center, Munich, Germany

14 Charité – Universitätsmedizin Berlin, corporate member of Freie Universität Berlin and Humboldt-Universität zu Berlin, NUM Coordination Office, Charitéplatz 1, 10117 Berlin, Germany

15 Hannover Medical School, Hannover Unified Biobank, Hannover, Germany

16 Charité – Universitätsmedizin Berlin, Corporate Member of Freie Universität Berlin and Humboldt-Universität zu Berlin, Department of Infectious Diseases, Respiratory Medicine and Critical Care, Clinical Trial Unit Berlin, Berlin, Germany

17 Institute of Social Medicine, Epidemiology and Health Economics, Charité – Universitätsmedizin Berlin, corporate member of Freie Universität Berlin and Humboldt-Universität zu Berlin, Berlin, Germany

18 Deutsches Herzzentrum der Charité, Institute of Computer-assisted Cardiovascular Medicine, Berlin, Germany

19 Charité – Universitätsmedizin Berlin, corporate member of Freie Universität Berlin and Humboldt Universität zu Berlin, Berlin, Germany

20 Department of Radiology, Ludwig-Maximilians-University Hospital, Munich, Germany

21 University of Cologne, Faculty of Medicine and University Hospital of Cologne, Department I of Internal Medicine, Center for Integrated Oncology Aachen Bonn Cologne Duesseldorf, Cologne, Germany

22 Charité – Universitätsmedizin Berlin, corporate member of Freie Universität Berlin and Humboldt-Universität zu Berlin, Clinical Trial Office, Berlin, Germany

23 Institute of Clinical Chemistry and Laboratory Medicine, University Medicine Greifswald, Greifswald, Germany

24 Department of Medicine II, University Hospital, LMU Munich, Munich, Germany

25 German Center for Infection Research (DZIF), Partner-Site Munich, Munich, Germany

26 Hospital Lippe, Department of Gastroenterology and Infectious Diseases, Lippe, Germany

27 Bielefeld University, Medical School OWL, Bielefeld, Germany

28 Goethe University Frankfurt, University Hospital Frankfurt, Department II of Infectious Diseases, Frankfurt am Main, Germany

29 German Center for Infection Research (DZIF), Partner-Site Cologne-Bonn, Cologne, Germany

### **Corresponding authors**

Jörg Janne Vehreschild

Goethe University Frankfurt, University Hospital, Center for Internal Medicine, Medical  
Department 2, Frankfurt, Germany

Theodor-Stern-Kai 7, 60596 Frankfurt am Main

Tel.: +49 151 17192218, Email: [j.vehreschild@med.uni-frankfurt.de](mailto:j.vehreschild@med.uni-frankfurt.de)

Katharina S. Appel

Goethe University Frankfurt, University Hospital, Center for Internal Medicine, Medical  
Department 2, Frankfurt, Germany

Theodor-Stern-Kai 7, 60596 Frankfurt am Main

Tel.: +49 151 1719 0565; Email: [appel@med.uni-frankfurt.de](mailto:appel@med.uni-frankfurt.de)

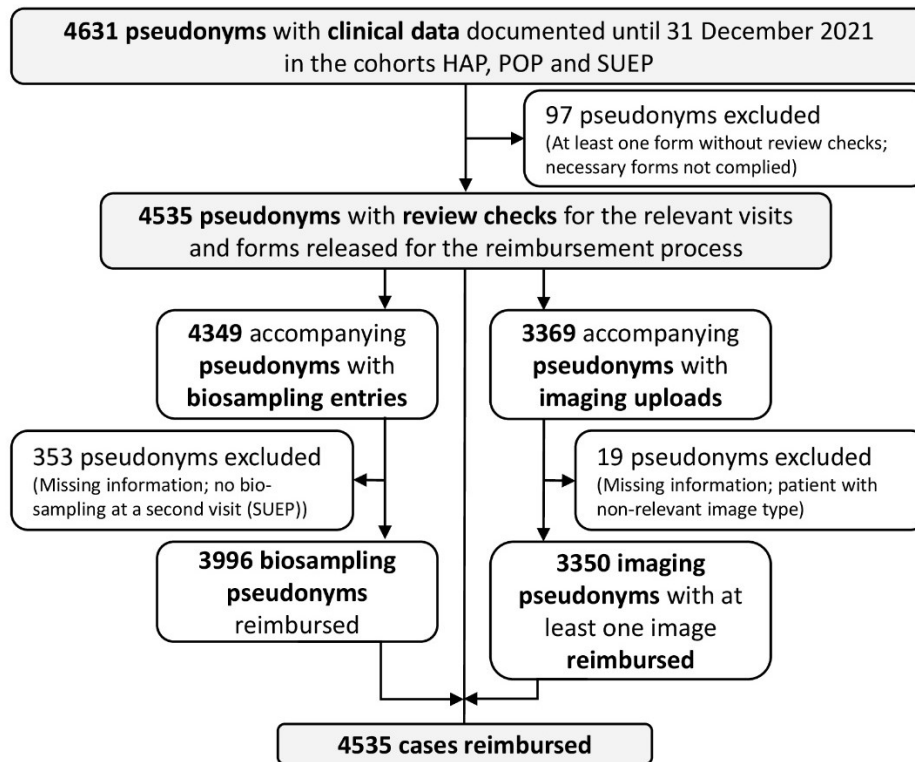

**Figure S1.** Flowchart of reimbursed cases and reasons for exclusion.

For each data management system, a different set of rules for quality assurance and validation is applied. Pseudonyms who did not fulfil these criteria could not be reimbursed. The reimbursement of the clinical data is the prerequisite for the accompanying reimbursement of the image uploads and biosampling for each accompanying pseudonym (different pseudonyms in each data management system). As biosampling is not feasible or images are not available (and planned) for some participating (non-university) study sites, there are less pseudonyms in the imaging or biosampling management system than in the clinical data management system, especially in the SUEP cohort. High-Resolution Platform (HAP); Population-Based Platform (POP); Cross-Sectoral Platform (SUEP).

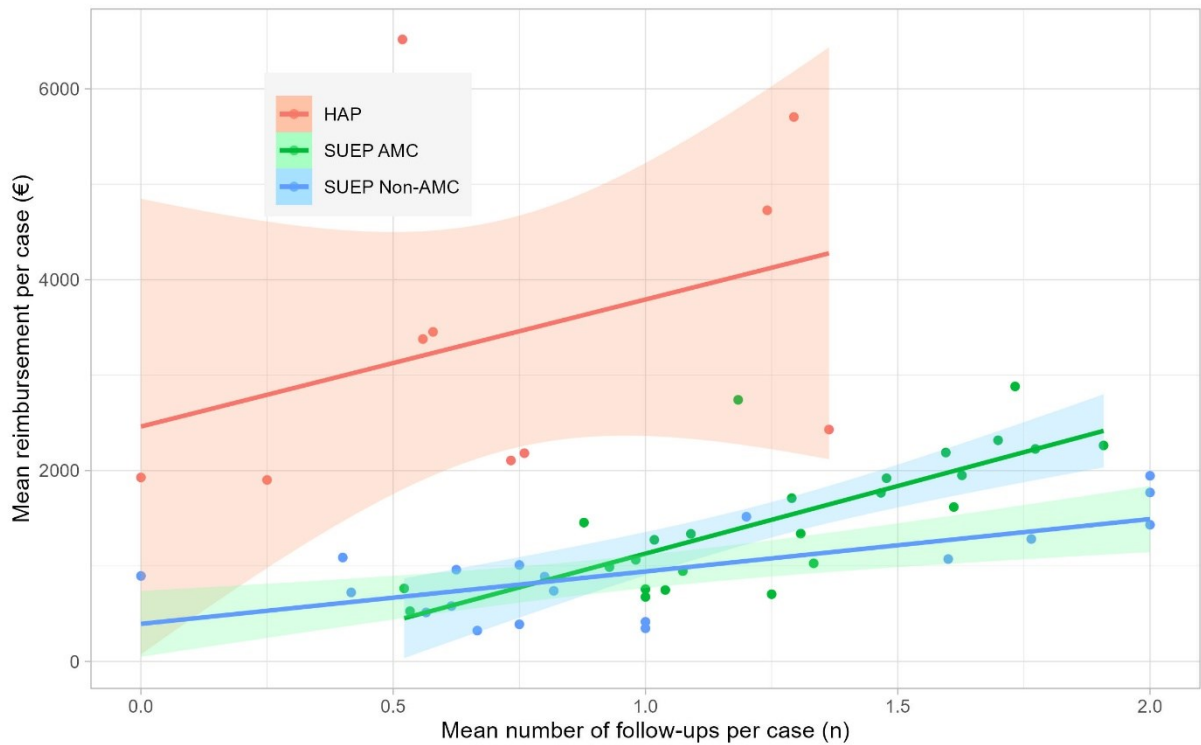

**Figure S2.** Mean reimbursement per case increases with the number of follow-ups.

The relationship between the average reimbursement per case and mean number of follow ups is displayed using a regression line and standard error by platform. We observed a positive correlation (Pearson's correlation coefficient) for clinical data reimbursement with compliance to the FU for the SUEP (SUEP AMC:  $r=0.77$ ,  $p<0.001$ ; SUEP non-AMC:  $r=0.69$ ,  $p=0.001$ ). The variance in the HAP FUs was high ( $r=0.36$ ,  $p=0.308$ ). The Population-Based Platform did not have a follow-up in the first funding period. High-Resolution Platform (HAP); Cross-Sectoral Platform academic medical centres (SUEP AMC); Cross-Sectoral Platform non-academic medical centres (SUEP AMC).

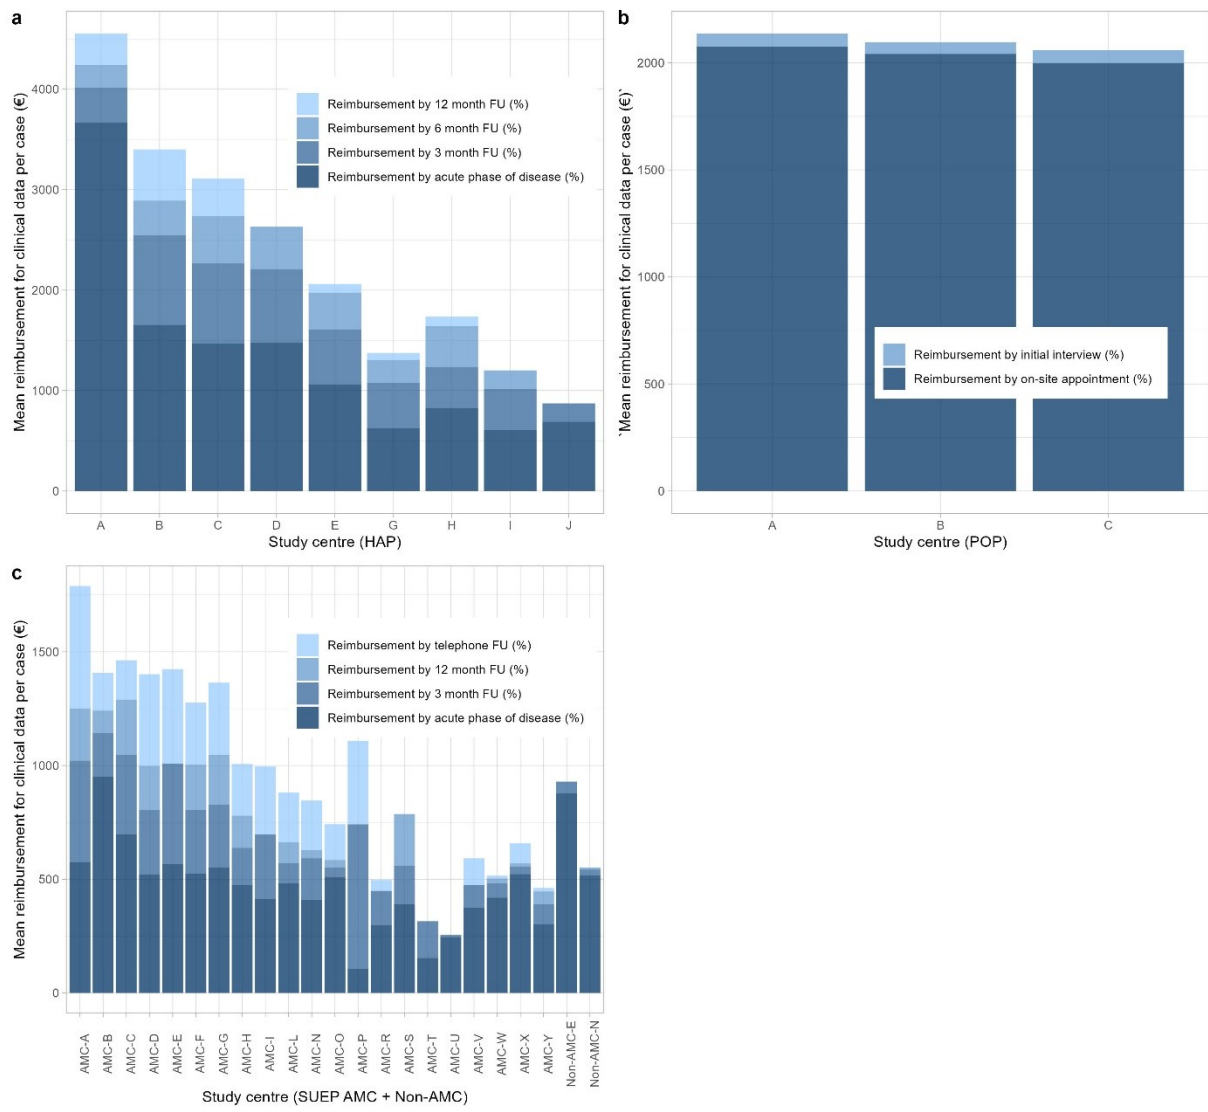

**Figure S3.** Contribution of visit types in the course of disease to total clinical documentation-based reimbursement of each study centre.

Each colour shaded section reflects the types of visits applicable by the respective study protocol of the cohort. Section (a) and (b) show the composition of HAP and POP, SUEP non-AMC are embedded together with SUEP AMC in (c), as there are few centres with finished cases. Due to the longitudinal design, the follow-up visits of certain cases might not have been applicable. This depiction only includes cases who had the chance to participate in all follow-up visits. Follow-up (FU); High-Resolution Platform (HAP); Population-Based Platform (POP); Cross-Sectoral Platform academic medical centre (SUEP AMC); Cross-Sectoral Platform non-academic medical centre (SUEP Non-AMC).

Charite – Universitätsmedizin Berlin  
Koordinierungsstelle Netzwerk Universitätsmedizin  
Charitéplatz 1  
10117 Berlin

Betreff: 01KX2021; NUM Case Fees; NAPKON; IA 88116131 (NAPKON)

## **Einzelpatient:innennachweis für Zentrum [REDACTED]**

Dokument-Nummer: 2204051-0206-0001

**05.04.2022**

Patient:innen ID: pheno\_ [REDACTED]

|                   |          | <b>Leistungen</b>                      | <b>Einzelvergütung</b> | <b>Abgerechnete Anzahl</b> | <b>Gesamte Vergütung</b> |
|-------------------|----------|----------------------------------------|------------------------|----------------------------|--------------------------|
| <b>Datum</b>      |          |                                        |                        |                            |                          |
| <b>25.02.2021</b> | <b>1</b> | Doku Allgemein Screening + Baseline    | 115,29                 | 1                          | 115,29                   |
|                   | <b>2</b> | Entscheidung über Studieneinschluss    | 5,59                   | 1                          | 5,59                     |
|                   | <b>3</b> | Patient*inneninformation, Einwilligung | 32,33                  | 1                          | 32,33                    |
|                   | <b>4</b> | Prüfung Ein- und Ausschlusskriterien   | 26,76                  | 1                          | 26,76                    |
| <b>01.03.2021</b> | <b>5</b> | Doku Allgemein Visite Normalstation    | 66,15                  | 1                          | 66,15                    |
| <b>05.03.2021</b> | <b>6</b> | Doku Allgemein Visite Normalstation    | 66,15                  | 1                          | 66,15                    |
| <b>12.04.2021</b> | <b>7</b> | Doku Allgemein Telefon-Follow-Up       | 20,79                  | 1                          | 20,79                    |
|                   | <b>8</b> | Mindestpauschale PROM                  | 22,71                  | 1                          | 22,71                    |
|                   | <b>9</b> | Terminvereinbarung Patient:in          | 8,25                   | 1                          | 8,25                     |

**Gesamtkosten: 364,02 €**

**Figure S4.** Exemplary reimbursement document provided to the NAPKON study centres on the single patient level.

Additionally, an aggregation by centre (Figure S5) and an aggregation by platform is provided, respectively.

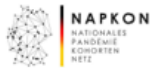

Charité – Universitätsmedizin Berlin  
 Koordinierungsstelle Netzwerk Universitätsmedizin  
 Charitéplatz 1  
 10117 Berlin

Betreff: 01KX2021; NUM Case Fees; NAPKON; IA 88116131 (NAPKON)

**Leistungsübersicht für [REDACTED]**

Dokument-Nummer: 2204051-0209-0001 **05.04.2022**

**Leistungsübersicht:**

|    | Aktivität                             | Einzelvergütung | Abgerechnete Anzahl | Gesamte Vergütung |
|----|---------------------------------------|-----------------|---------------------|-------------------|
| 1  | Arbeitsfähigkeit (2/6)                | 13,62           | 3                   | 13,62             |
| 2  | Arbeitsfähigkeit (3/6)                | 13,62           | 2                   | 13,62             |
| 3  | Arbeitsfähigkeit (4/6)                | 13,62           | 21                  | 190,68            |
| 4  | Arbeitsfähigkeit (5/6)                | 13,62           | 3                   | 34,05             |
| 5  | CT-Kranial                            | 28,53           | 4                   | 114,12            |
| 6  | CT-Körperregion unsicher              | 28,53           | 8                   | 228,24            |
| 7  | CT-Thorax                             | 28,53           | 3                   | 85,59             |
| 8  | Doku Allgemein Screening + Baseline   | 115,29          | 59                  | 6.802,11          |
| 9  | Doku Allgemein Telefon-Follow-Up      | 20,79           | 4                   | 83,16             |
| 10 | Doku Allgemein Visite Ambulant        | 66,15           | 3                   | 198,45            |
| 11 | Doku Allgemein Visite Intensivstation | 122,86          | 40                  | 4.914,40          |
| 12 | Doku Allgemein Visite Normalstation   | 66,15           | 86                  | 5.688,90          |
| 13 | EQ-5D-5L                              | 13,62           | 32                  | 435,84            |
| 14 | Entscheidung über Studieneinschluss   | 5,59            | 60                  | 335,40            |
| 15 | PHQ-4                                 | 9,08            | 32                  | 290,56            |
| 16 | PROMIS Global Health                  | 22,71           | 32                  | 726,72            |
| 17 | PROMIS Kognitive Funktion             | 9,08            | 32                  | 290,56            |

|    | Aktivität                                            | Einzelvergütung | Abgerechnete Anzahl | Gesamte Vergütung |
|----|------------------------------------------------------|-----------------|---------------------|-------------------|
| 18 | Patient*inneninformation, Einwilligung               | 32,33           | 60                  | 1.939,80          |
| 19 | Prüfung Ein- und Ausschlusskriterien                 | 26,76           | 60                  | 1.605,60          |
| 20 | Röntgen-Thorax                                       | 28,53           | 60                  | 1.711,80          |
| 21 | Screeningfragen zu Schmerz, Dyspnoe, Fatigue         | 24,97           | 1                   | 24,97             |
| 22 | Screeningfragen zu Schmerz, Dyspnoe, Fatigue (10/11) | 24,97           | 8                   | 181,60            |
| 23 | Screeningfragen zu Schmerz, Dyspnoe, Fatigue (3/11)  | 24,97           | 23                  | 156,63            |
| 24 | Terminvereinbarung Patient:in                        | 8,25            | 35                  | 288,75            |
| 25 | Vitalzeichenkontrolle                                | 5,50            | 2                   | 11,00             |

|                                                           |
|-----------------------------------------------------------|
| <b>Kumulierte Kosten: 26.366,17 €</b>                     |
| <b>Projektpauschalen 20%: 5.273,23 €</b>                  |
| <b>Kumulierte Gesamtkosten: 31.639,40 €</b>               |
| <b>Entsprechung in Standardfällen (2.904,67 €): 10,89</b> |
| <b>Gesamtkosten für 11 Standardfälle : 31.951,37 €</b>    |

Weitere Informationen über zukünftig projizierte Kosten werden separat ausgewiesen.

**Enthaltene Pseudonyme:**

Abz. Anzahl der Fälle 60

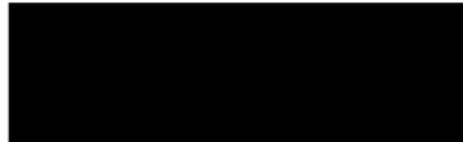

**Figure S5.** Exemplary reimbursement documents provided to the NAPKON study centres on the centre aggregation level.

Additionally, a single patient overview and an aggregation by platform is provided to the centres and the platform coordination, respectively.

**Table S1.** Programming languages, platforms, and libraries.

| <b>Programs</b>  | <b>Version</b> | <b>Producer</b>                                                       | <b>Reference</b>                                                                                                                          |
|------------------|----------------|-----------------------------------------------------------------------|-------------------------------------------------------------------------------------------------------------------------------------------|
| <b>Python</b>    | 3.8.6          | Python Software Foundation                                            | <a href="https://www.python.org/">https://www.python.org/</a>                                                                             |
| jinja2           | 2.11.0         | Pallets                                                               | <a href="https://jinja.palletsprojects.com/">https://jinja.palletsprojects.com/</a>                                                       |
| numpy            | 1.19.4         | NumPy                                                                 | <a href="https://numpy.org/">https://numpy.org/</a>                                                                                       |
| pandas           | 1.3.1          | NumFOCUS, Inc.                                                        | <a href="https://pandas.pydata.org/">https://pandas.pydata.org/</a>                                                                       |
| pdfkit           | 1.0.0          | PyPI                                                                  | <a href="https://pypi.org/project/pdfkit/">https://pypi.org/project/pdfkit/</a>                                                           |
| <b>R</b>         | 4.0.2          | The R Foundation                                                      | <a href="https://www.r-project.org/">https://www.r-project.org/</a>                                                                       |
| data.table       | 1.14.0         | Matt Dowle, Arun Srinivasan                                           | <a href="https://cran.r-project.org/web/packages/data.table/index.html">https://cran.r-project.org/web/packages/data.table/index.html</a> |
| dplyr            | 1.0.5          | Hadley Wickham, Romain François, Lionel Henry, Kirill Müller, RStudio | <a href="https://dplyr.tidyverse.org/">https://dplyr.tidyverse.org/</a>                                                                   |
| lubridate        | 1.7.10         | Vitalie Spinu, Garrett Golemund, Hadley Wickham                       | <a href="https://lubridate.tidyverse.org/">https://lubridate.tidyverse.org/</a>                                                           |
| readxl           | 1.3.1          | Hadley Wickham, Jennifer Bryan, RStudio                               | <a href="https://readxl.tidyverse.org/">https://readxl.tidyverse.org/</a>                                                                 |
| readr            | 2.0.1          | Hadley Wickham, Jim Hester, Jennifer Bryan, RStudio                   | <a href="https://readr.tidyverse.org/">https://readr.tidyverse.org/</a>                                                                   |
| <b>RStudio</b>   | 1.3.1093       | posit                                                                 | <a href="https://posit.co/">https://posit.co/</a>                                                                                         |
| <b>Django</b>    | 3.0.10         | Django Software Foundation                                            | <a href="https://www.djangoproject.com/">https://www.djangoproject.com/</a>                                                               |
| <b>Nextcloud</b> | 21.0.9         | Nextcloud GmbH                                                        | <a href="https://nextcloud.com/">https://nextcloud.com/</a>                                                                               |
| <b>Keycloak</b>  | 18.0.0         | WildFly, a division of Red Hat                                        | <a href="https://www.keycloak.org/">https://www.keycloak.org/</a>                                                                         |

**Table S2:** Recruitment and reimbursement characteristics by cohort and centre.

| Centre                                                          | First enrolment (Month/Year) | Documented cases (n) | Reimbursed cases (n) | Average reimbursement per case (€) | Fulfilment rate follow up month 3 (%) | Fulfilment rate follow up month 6 (%) | Fulfilment rate follow up month 12 (%) | Fulfilment rate follow up by telephone (%) |
|-----------------------------------------------------------------|------------------------------|----------------------|----------------------|------------------------------------|---------------------------------------|---------------------------------------|----------------------------------------|--------------------------------------------|
| <b>High-Resolution Platform</b>                                 |                              |                      |                      |                                    |                                       |                                       |                                        |                                            |
| Centre A                                                        | 11/2020                      | 164                  | 164                  | 6,797.53                           | 37.1                                  | 42.0                                  | 26.2                                   |                                            |
| Centre B                                                        | 12/2020                      | 34                   | 34                   | 6,170.33                           | 88.0                                  | 77.3                                  | 33.3                                   |                                            |
| Centre C                                                        | 1/2021                       | 29                   | 29                   | 5,299.43                           | 86.4                                  | 66.7                                  | 41.7                                   |                                            |
| Centre D                                                        | 2/2021                       | 102                  | 102                  | 3,876.32                           | 40.9                                  | 33.9                                  | 0.0                                    |                                            |
| Centre E                                                        | 2/2021                       | 38                   | 38                   | 3,626.85                           | 44.0                                  | 34.6                                  | 5.0                                    |                                            |
| Centre F                                                        | 11/2021                      | 10                   | 10                   | 2,867.22                           | 0.0                                   | 0.0                                   | 0.0                                    |                                            |
| Centre G                                                        | 2/2021                       | 30                   | 30                   | 2,827.40                           | 52.0                                  | 44.4                                  | 50.0                                   |                                            |
| Centre H                                                        | 2/2021                       | 11                   | 11                   | 2,787.08                           | 72.7                                  | 54.5                                  | 25.0                                   |                                            |
| Centre I                                                        | 4/2021                       | 25                   | 25                   | 2,480.22                           | 54.5                                  | 23.8                                  | 0.0                                    |                                            |
| Centre J                                                        | 3/2021                       | 4                    | 4                    | 1,901.91                           | 25.0                                  | 0.0                                   | 0.0                                    |                                            |
| <b>Population-Based Platform</b>                                |                              |                      |                      |                                    |                                       |                                       |                                        |                                            |
| Centre A                                                        | 3/2021                       | 301                  | 301                  | 2,804.74                           |                                       |                                       |                                        |                                            |
| Centre B                                                        | 1/2021                       | 348                  | 348                  | 2,756.18                           |                                       |                                       |                                        |                                            |
| Centre C                                                        | 11/2020                      | 1663                 | 1663                 | 2,658.20                           |                                       |                                       |                                        |                                            |
| <b>Cross-Sectoral Platform – academic medical centres (AMC)</b> |                              |                      |                      |                                    |                                       |                                       |                                        |                                            |
| Centre A                                                        | 1/2021                       | 88                   | 86                   | 3,479.29                           | 84.9                                  |                                       | 78.6                                   | 74.9                                       |
| Centre B                                                        | 1/2021                       | 50                   | 49                   | 2,864.11                           | 52.9                                  |                                       | 33.3                                   | 25.7                                       |
| Centre C                                                        | 12/2020                      | 84                   | 83                   | 2,799.78                           | 80.3                                  |                                       | 78.1                                   | 26.4                                       |
| Centre D                                                        | 1/2021                       | 80                   | 76                   | 2,795.10                           | 75.7                                  |                                       | 53.8                                   | 59.4                                       |
| Centre E                                                        | 2/2021                       | 114                  | 110                  | 2,793.60                           | 86.0                                  |                                       | 0.0                                    | 51.7                                       |
| Centre F                                                        | 1/2021                       | 45                   | 44                   | 2,778.53                           | 89.5                                  |                                       | 61.5                                   | 43.4                                       |
| Centre G                                                        | 1/2021                       | 42                   | 42                   | 2,691.39                           | 70.6                                  |                                       | 60.0                                   | 93.1                                       |
| Centre H                                                        | 11/2020                      | 91                   | 90                   | 2,354.12                           | 63.0                                  |                                       | 19.5                                   | 33.4                                       |
| Centre I                                                        | 3/2021                       | 61                   | 60                   | 2,323.38                           | 74.1                                  |                                       | 17.4                                   | 41.4                                       |



|          |         |     |     |          |       |      |      |
|----------|---------|-----|-----|----------|-------|------|------|
| Centre J | 12/2021 | 3   | 3   | 2,293.73 | 100.0 | 0.0  | 50.0 |
| Centre K | 6/2021  | 19  | 13  | 2,171.67 | 46.2  | 0.0  | 36.4 |
| Centre L | 2/2021  | 69  | 69  | 2,102.35 | 56.5  | 15.0 | 41.4 |
| Centre M | 7/2021  | 15  | 15  | 2,026.79 | 77.8  | 0.0  | 41.5 |
| Centre N | 1/2021  | 73  | 72  | 2,015.81 | 70.8  | 29.0 | 32.2 |
| Centre O | 12/2020 | 82  | 82  | 1,721.52 | 52.1  | 46.2 | 26.4 |
| Centre P | 4/2021  | 112 | 100 | 1,611.16 | 30.5  | 0.0  | 29.7 |
| Centre Q | 5/2021  | 47  | 46  | 1,532.44 | 57.1  | 0.0  | 9.8  |
| Centre R | 3/2021  | 51  | 51  | 1,503.03 | 62.5  | 0.0  | 12.6 |
| Centre S | 1/2021  | 60  | 57  | 1,500.83 | 64.0  | 55.2 | 3.6  |
| Centre T | 2/2021  | 60  | 56  | 1,357.91 | 38.9  | 0.0  | 2.3  |
| Centre U | 3/2021  | 9   | 9   | 1,313.39 | 50.0  | 0.0  | 4.8  |
| Centre V | 2/2021  | 54  | 52  | 1,271.10 | 38.3  | 11.1 | 12.5 |
| Centre W | 2/2021  | 60  | 60  | 1,267.27 | 61.4  | 66.7 | 10.0 |
| Centre X | 12/2020 | 54  | 54  | 1,046.92 | 59.2  | 24.4 | 25.3 |
| Centre Y | 2/2021  | 62  | 60  | 980.30   | 37.5  | 0.0  | 5.1  |

---

**Cross-Sectoral Platform – non-academic medical centres (non-AMC)**

---

|          |         |    |    |          |       |       |       |
|----------|---------|----|----|----------|-------|-------|-------|
| Centre A | 8/2021  | 9  | 9  | 2,165.96 | 100.0 | 0.0   | 90.9  |
| Centre B | 10/2021 | 5  | 5  | 2,034.76 | 100.0 | 100.0 | 100.0 |
| Centre C | 8/2021  | 2  | 2  | 1,621.10 | 100.0 | 0.0   | 100.0 |
| Centre D | 8/2021  | 18 | 17 | 1,542.94 | 100.0 | 0.0   | 100.0 |
| Centre E | 3/2021  | 6  | 5  | 1,534.00 | 100.0 | 0.0   | 40.0  |
| Centre F | 9/2021  | 6  | 5  | 1,366.25 | 100.0 | 0.0   | 100.0 |
| Centre G | 8/2021  | 17 | 16 | 1,338.55 | 72.7  | 0.0   | 100.0 |
| Centre H | 12/2021 | 1  | 1  | 1,261.97 | 0.0   | 0.0   | 0.0   |
| Centre I | 10/2021 | 14 | 8  | 1,234.53 | 62.5  | 0.0   | 62.5  |
| Centre J | 11/2021 | 5  | 5  | 1,200.46 | 100.0 | 0.0   | 80.0  |
| Centre K | 4/2021  | 5  | 5  | 1,170.39 | 66.7  | 0.0   | 14.3  |
| Centre L | 7/2021  | 22 | 22 | 1,029.63 | 89.5  | 0.0   | 66.7  |
| Centre M | 10/2021 | 14 | 13 | 858.90   | 33.3  | 0.0   | 23.1  |
| Centre N | 2/2021  | 50 | 48 | 736.69   | 34.9  | 16.7  | 11.3  |
| Centre O | 11/2021 | 1  | 1  | 712.82   | 100.0 | 0.0   | 0.0   |

|          |         |    |    |        |       |     |       |
|----------|---------|----|----|--------|-------|-----|-------|
| Centre P | 12/2021 | 4  | 4  | 685.66 | 0.0   | 0.0 | 75.0  |
| Centre Q | 12/2021 | 2  | 2  | 666.75 | 0.0   | 0.0 | 100.0 |
| Centre R | 10/2021 | 3  | 3  | 599.77 | 100.0 | 0.0 | 50.0  |
| Centre S | 8/2021  | 25 | 23 | 529.81 | 61.9  | 0.0 | 2.8   |

Fulfilment rates are calculated without deceased patients. If the recruitment launch of a centre was comparably late, the conduction of a certain follow-up might not (yet) have been feasible.
